# Supplementary material for: Reversible multiplexing optical information storage and photoluminescence switching in Eu2+-doped fluorophosphate-based tunable photochromic materials
Source: Royal Society of Chemistry journal article supplement (doi:10.1039/d1tc00759a), 2021-01-01
Supplement: d1tc00759a1.pdf [file d1tc00759a1.pdf]

## Supporting Information

### Reversible multiplexing optical information storage and photoluminescence switching in Eu<sup>2+</sup> doped fluorophosphate-based tunable photochromic materials

Yang Lv<sup>1,2</sup>, Shaoan Zhang<sup>2</sup>, Zhenzhang Li<sup>3</sup>, Yahong Jin<sup>1,5,\*</sup>, Haoyi Wu<sup>1</sup>,  
Guifang Ju<sup>1</sup>, Li Chen<sup>1</sup>, Zhengfa Hu<sup>1,4</sup>, Yihua Hu<sup>1,4\*</sup>

*<sup>1</sup>School of Physics and Optoelectronic Engineering, Guangdong University of*

*Technology, WaiHuan Xi Road, No. 100, Guangzhou 510006, China*

*<sup>2</sup>School of Optoelectronic Engineering, Guangdong Polytechnic Normal*

*University, Zhongshan Avenue No. 293 West, Tianhe District, Guangzhou, 510665,*

*China*

*<sup>3</sup>College of Mathematics and Systems Science, Guangdong Polytechnic Normal*

*University, Zhongshan Avenue No. 293 West, Tianhe District, Guangzhou, 510665,*

*China*

*<sup>4</sup> Synergy Innovation Institute for Modern Industries of Dongyuan and*

*GDUT, Heyuan 517025, China*

*<sup>5</sup> Department of Chemistry, The Hong Kong University of Science and*

*Technology, Kowloon, 999077, Hong Kong, China*

#### Corresponding author:

Fax: +86 20 39322265;

Tel: +86 20 39322262;

---

E-mail: [yhjin@gdut.edu.cn](mailto:yhjin@gdut.edu.cn) (Y. Jin)

E-mail: [huyh@gdut.edu.cn](mailto:huyh@gdut.edu.cn) (Y. Hu)

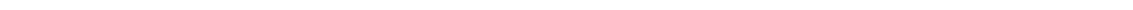

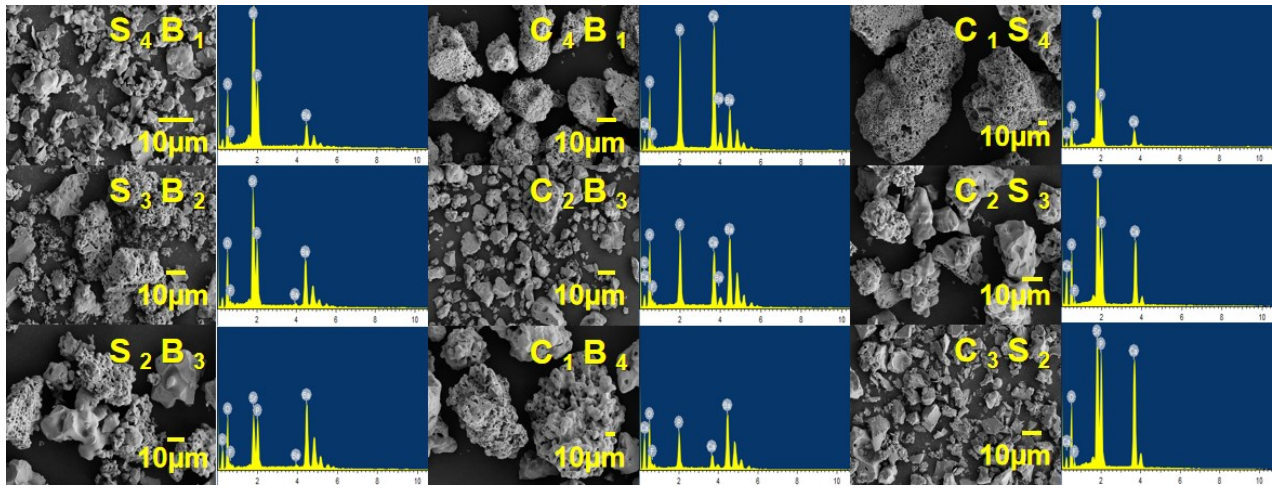

Fig. S1 SEM images of the samples  $S_4B_1$ ,  $S_3B_2$ ,  $S_2B_3$ ,  $C_4B_1$ ,  $C_2B_3$ ,  $C_1B_4$ ,  $C_1S_4$ ,  $C_2S_3$  and  $C_3S_2$ , together with the EDS spectra (the right side).

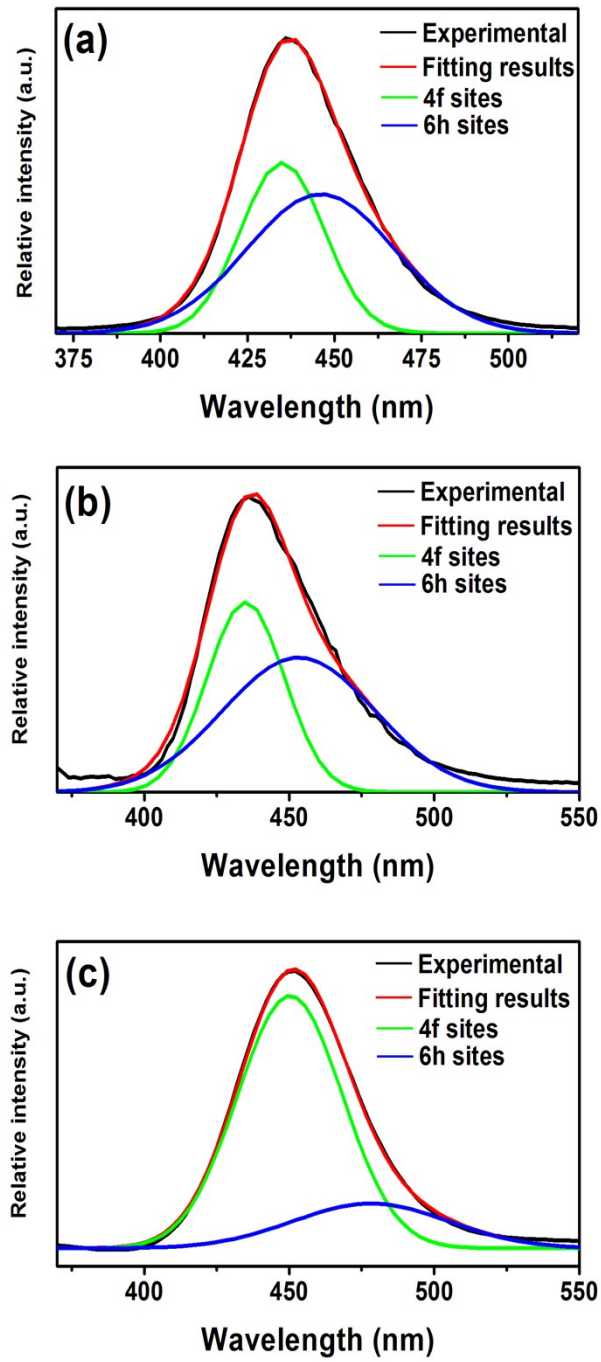

Fig. S2 The Gaussian fitting results of samples (a) S5, (b) B5, (c) C5.

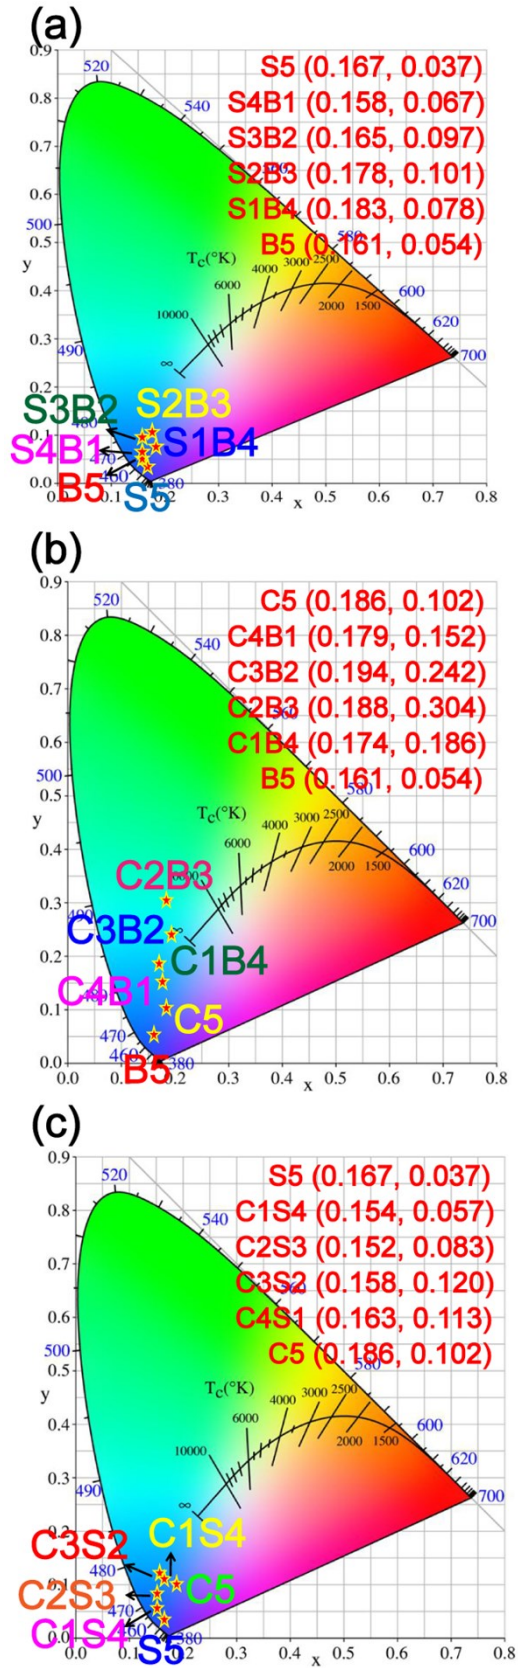

Fig. S3 CIE chromaticity of (a)  $(\text{Sr}, \text{Ba})_5(\text{PO}_4)_3\text{F}:\text{Eu}^{2+}$ , (b)  $(\text{Ca}, \text{Ba})_5(\text{PO}_4)_3\text{F}:\text{Eu}^{2+}$ , (c)  $(\text{Ca}, \text{Sr})_5(\text{PO}_4)_3\text{F}:\text{Eu}^{2+}$ .

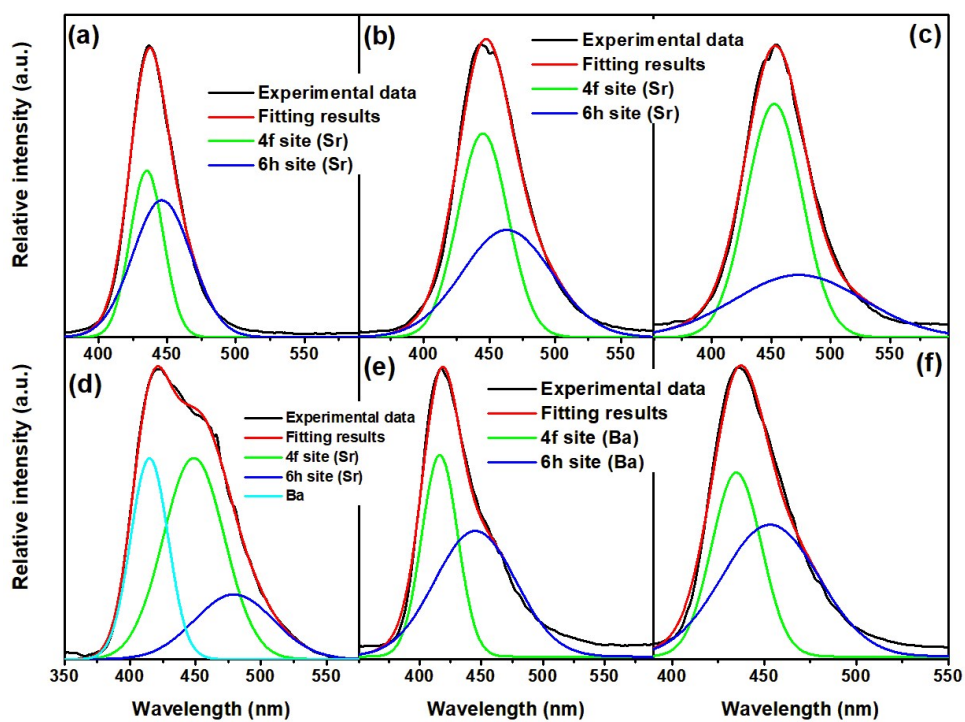

Fig. S4 The Gaussian fitting results of  $(\text{Sr}, \text{Ba})_5(\text{PO}_4)_3\text{F}:\text{Eu}^{2+}$  solid solution (a) $\text{S}_5$ , (b) $\text{S}_4\text{B}_1$ ,  
(c) $\text{S}_3\text{B}_2$ , (d) $\text{S}_2\text{B}_3$ , (e) $\text{S}_1\text{B}_4$ , (f) $\text{B}_5$ .

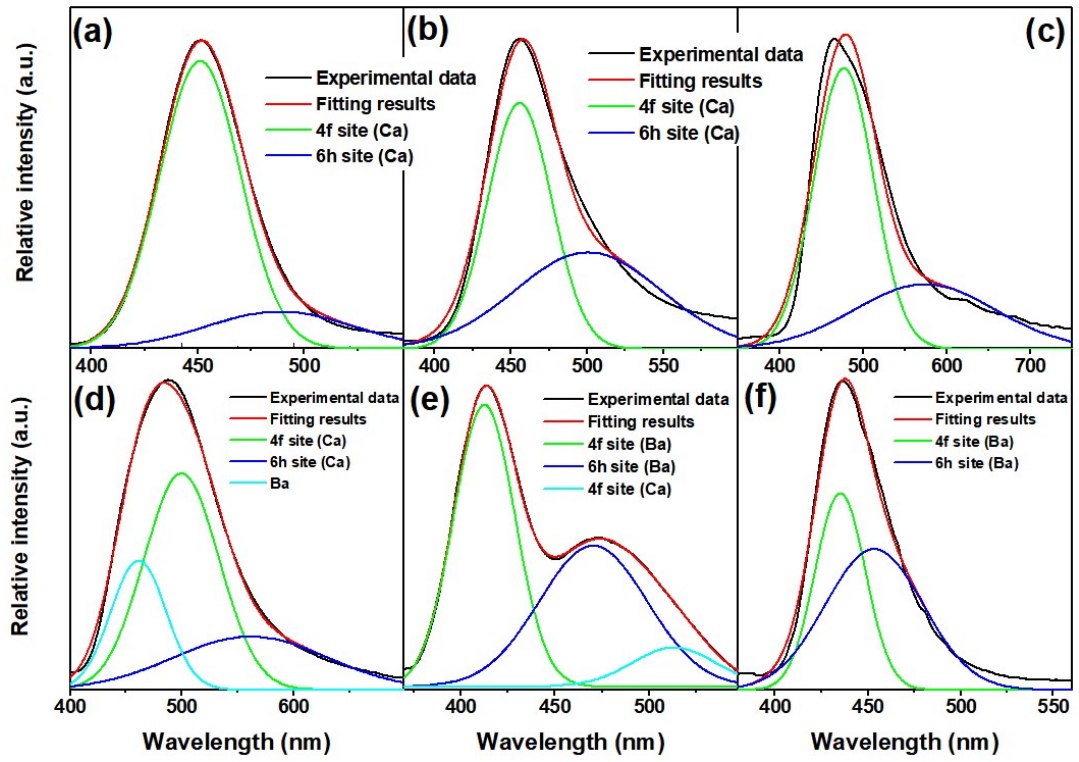

Fig. S5 The Gaussian fitting results of  $(\text{Ca, Ba})_5(\text{PO}_4)_3\text{F}:\text{Eu}^{2+}$  solid solution (a) $\text{C}_5$ , (b) $\text{C}_4\text{B}_1$ , (c) $\text{C}_3\text{B}_2$ , (d) $\text{C}_2\text{B}_3$ , (e) $\text{C}_1\text{B}_4$ , (f) $\text{B}_5$ .

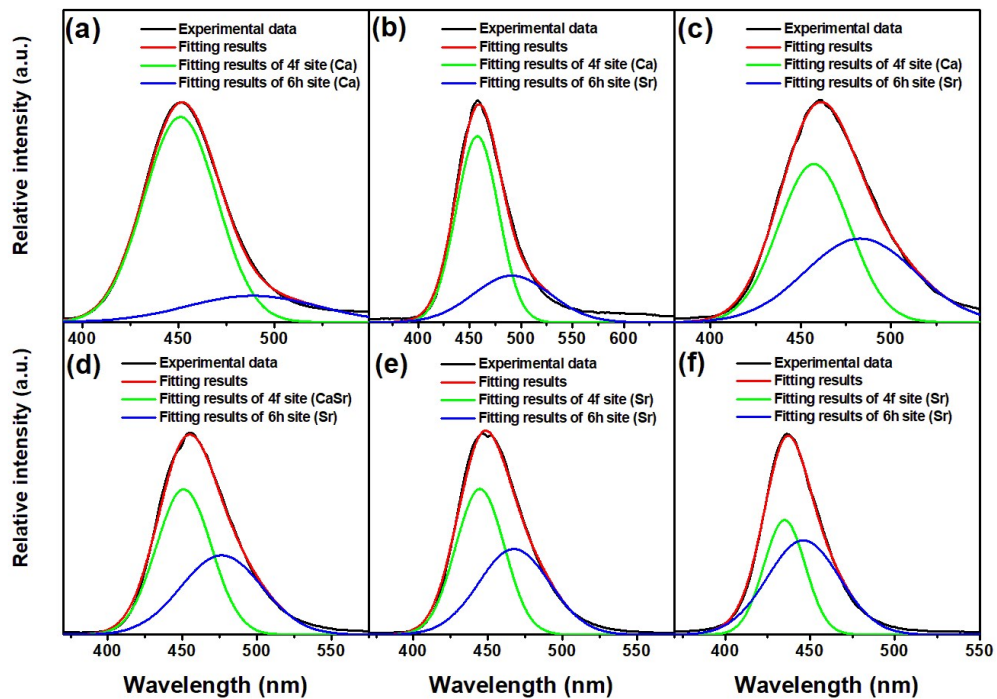

Fig. S6 The Gaussian fitting results of  $(\text{Ca, Sr})_5(\text{PO}_4)_3\text{F}:\text{Eu}^{2+}$  solid solution (a) $\text{C}_5$ , (b) $\text{C}_4\text{S}_1$ , (c) $\text{C}_3\text{S}_2$ , (d) $\text{C}_2\text{S}_3$ , (e) $\text{C}_1\text{S}_4$ , (f) $\text{S}_5$ .



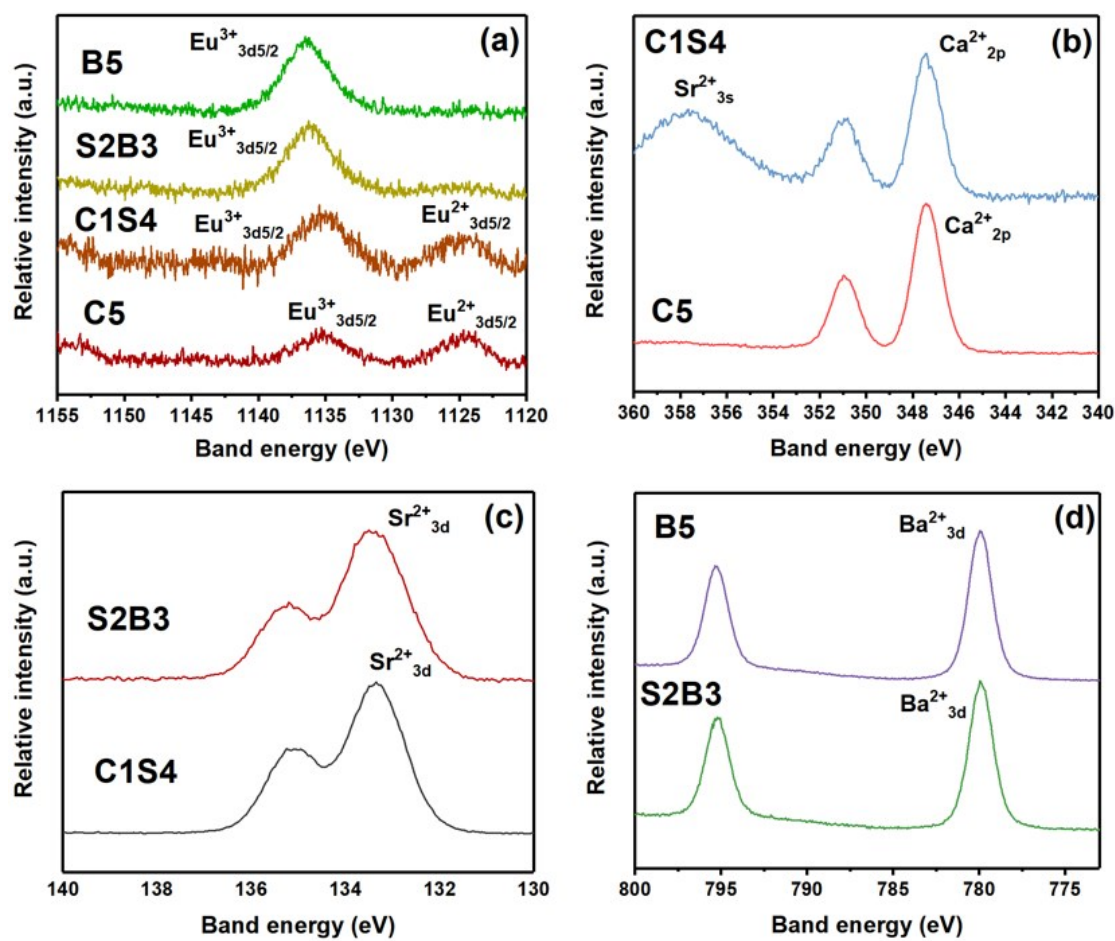

Fig. S7 XPS spectra of (a) Eu ions in C<sub>5</sub>, C<sub>1</sub>S<sub>4</sub>, S<sub>2</sub>B<sub>3</sub> and B<sub>5</sub>, (b) Ca<sup>2+</sup> ion in C<sub>5</sub> and C<sub>1</sub>S<sub>4</sub>, (c) Sr<sup>2+</sup> ion in C<sub>1</sub>S<sub>4</sub> and S<sub>2</sub>B<sub>3</sub>, (d) Ba<sup>2+</sup> ion in S<sub>2</sub>B<sub>3</sub> and B<sub>5</sub>.

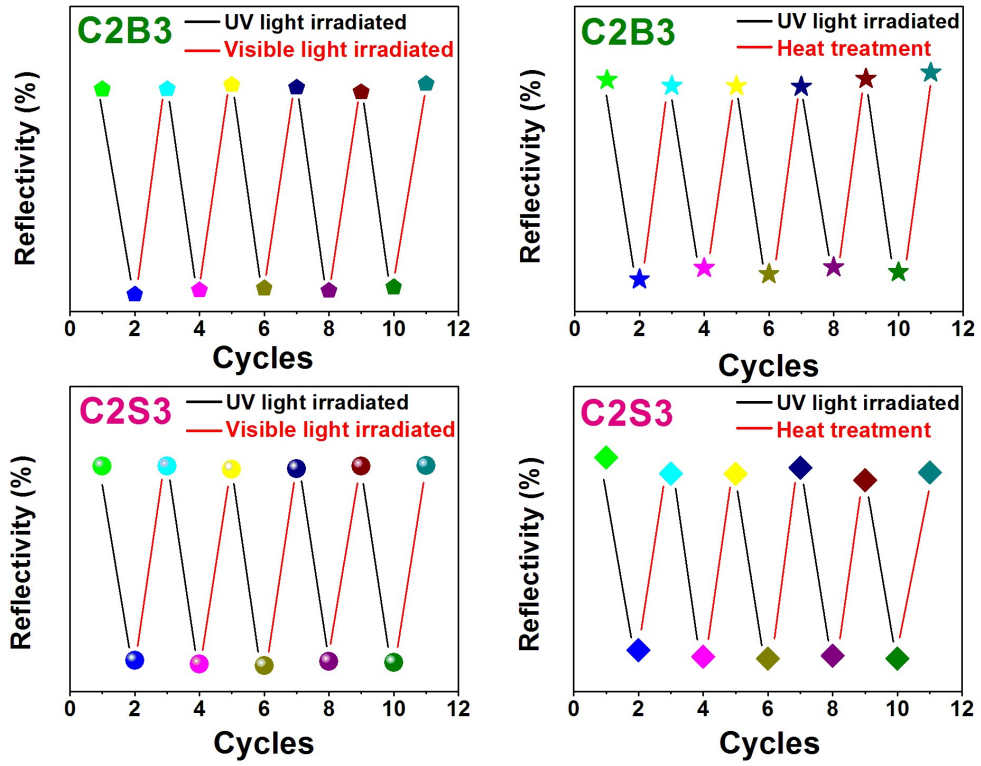

Fig. S8 The representative samples C2B3 and C2S3 after UV light and visible light/heat treatment for several cycles.

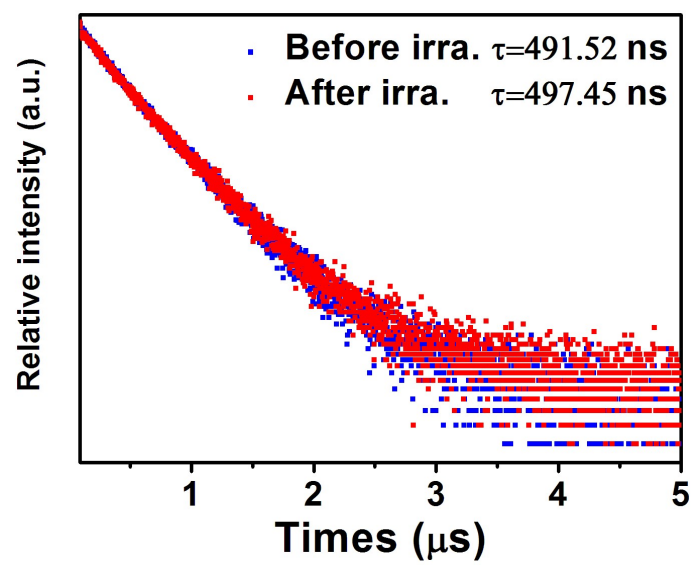

Fig. S9 Fluorescence lifetimes of C<sub>5</sub> before and after UV light irradiation.

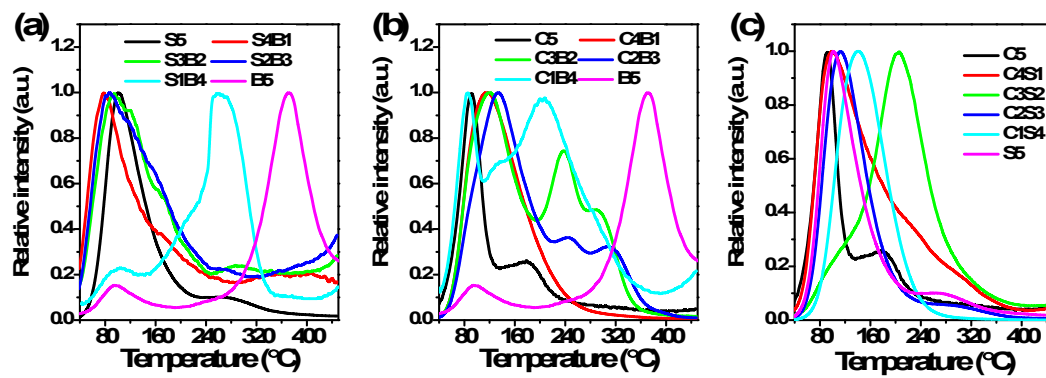

Fig. S10 TL spectra of (a)  $(\text{Sr}, \text{Ba})_5(\text{PO}_4)_3\text{F}:\text{Eu}^{2+}$ , (b)  $(\text{Ca}, \text{Ba})_5(\text{PO}_4)_3\text{F}:\text{Eu}^{2+}$ , (c)  $(\text{Ca}, \text{Sr})_5(\text{PO}_4)_3\text{F}:\text{Eu}^{2+}$ .

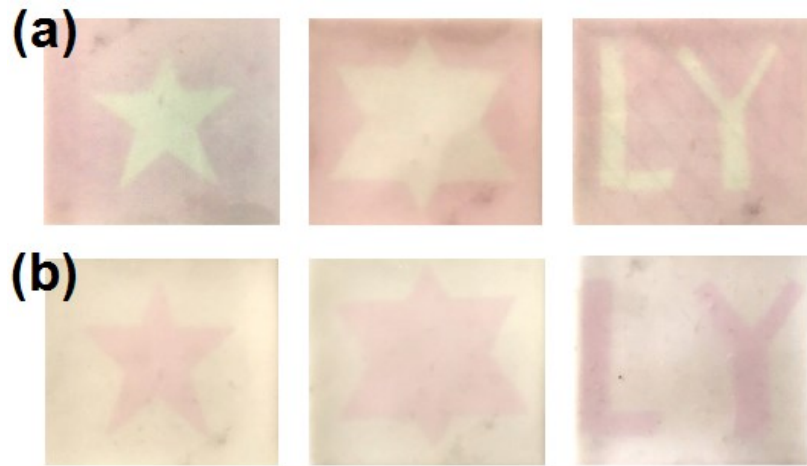

Fig. S11 (a) PC flexible films cover by the mask of patterns (pentagram and hexagram) and letters (L and Y) upon UV light irradiation (or colored PC flexible films cover by the hollow mask upon 365 nm light irradiation), (b) PC flexible films cover by the hollow mask of patterns (pentagram and hexagram) and letters (L and Y) upon UV light irradiation (or colored PC flexible films cover by the mask upon 365 nm light irradiation).

---

**Table S1 Atomic percentage of as-prepared samples based on EDS  
measurement**

| Sample                                                           | Atomic percentage (%) |             |             |             |             |            |
|------------------------------------------------------------------|-----------------------|-------------|-------------|-------------|-------------|------------|
|                                                                  | Ca                    | Sr          | Ba          | P           | O           | F          |
| <b>Ca<sub>5</sub>(PO<sub>4</sub>)<sub>3</sub>F</b>               | <b>19.7</b>           | <b>0</b>    | <b>0</b>    | <b>12.7</b> | <b>61.3</b> | <b>6.4</b> |
| <b>Ca<sub>4</sub>Ba(PO<sub>4</sub>)<sub>3</sub>F</b>             | <b>15.6</b>           | <b>0</b>    | <b>6.3</b>  | <b>13.8</b> | <b>57.8</b> | <b>6.5</b> |
| <b>Ca<sub>3</sub>Ba<sub>2</sub>(PO<sub>4</sub>)<sub>3</sub>F</b> | <b>10.2</b>           | <b>0</b>    | <b>9.4</b>  | <b>13.4</b> | <b>59.5</b> | <b>7.5</b> |
| <b>Ca<sub>2</sub>Ba<sub>3</sub>(PO<sub>4</sub>)<sub>3</sub>F</b> | <b>6.4</b>            | <b>0</b>    | <b>9.9</b>  | <b>9.7</b>  | <b>45.7</b> | <b>5.3</b> |
| <b>CaBa<sub>4</sub>(PO<sub>4</sub>)<sub>3</sub>F</b>             | <b>3.9</b>            | <b>0</b>    | <b>18.4</b> | <b>12.6</b> | <b>59.0</b> | <b>6.1</b> |
| <b>Ba<sub>5</sub>(PO<sub>4</sub>)<sub>3</sub>F</b>               | <b>25.2</b>           | <b>0</b>    | <b>0</b>    | <b>13.4</b> | <b>55.3</b> | <b>6.1</b> |
| <b>SrBa<sub>4</sub>(PO<sub>4</sub>)<sub>3</sub>F</b>             | <b>0</b>              | <b>3.9</b>  | <b>18.2</b> | <b>13.1</b> | <b>59.4</b> | <b>5.4</b> |
| <b>Sr<sub>2</sub>Ba<sub>3</sub>(PO<sub>4</sub>)<sub>3</sub>F</b> | <b>0</b>              | <b>4.4</b>  | <b>8.3</b>  | <b>6.4</b>  | <b>34.3</b> | <b>3.0</b> |
| <b>Sr<sub>3</sub>Ba<sub>2</sub>(PO<sub>4</sub>)<sub>3</sub>F</b> | <b>0</b>              | <b>13.7</b> | <b>9.0</b>  | <b>13.6</b> | <b>57.4</b> | <b>6.3</b> |
| <b>Sr<sub>4</sub>Ba(PO<sub>4</sub>)<sub>3</sub>F</b>             | <b>0</b>              | <b>17.3</b> | <b>3.9</b>  | <b>12.0</b> | <b>59.8</b> | <b>7.0</b> |
| <b>Sr<sub>5</sub>(PO<sub>4</sub>)<sub>3</sub>F</b>               | <b>0</b>              | <b>22.9</b> | <b>0</b>    | <b>11.8</b> | <b>59.6</b> | <b>6.6</b> |
| <b>CaSr<sub>4</sub>(PO<sub>4</sub>)<sub>3</sub>F</b>             | <b>3.5</b>            | <b>17.8</b> | <b>0</b>    | <b>11.5</b> | <b>60.1</b> | <b>7.2</b> |
| <b>Ca<sub>2</sub>Sr<sub>3</sub>(PO<sub>4</sub>)<sub>3</sub>F</b> | <b>8.7</b>            | <b>10.7</b> | <b>0</b>    | <b>11.0</b> | <b>62.7</b> | <b>6.9</b> |
| <b>Ca<sub>3</sub>Sr<sub>2</sub>(PO<sub>4</sub>)<sub>3</sub>F</b> | <b>11.3</b>           | <b>7.9</b>  | <b>0</b>    | <b>12.4</b> | <b>60.9</b> | <b>7.5</b> |
| <b>Ca<sub>4</sub>Sr(PO<sub>4</sub>)<sub>3</sub>F</b>             | <b>17.8</b>           | <b>3.7</b>  | <b>0</b>    | <b>12.0</b> | <b>60.9</b> | <b>5.6</b> |

**Table S2 Element proportion of ICP-MS measurement**

| Sample                                                                                | Element proportion |              |              |              | Emissio range     | peak          |
|---------------------------------------------------------------------------------------|--------------------|--------------|--------------|--------------|-------------------|---------------|
|                                                                                       | Ca                 | Sr           | Ba           | Eu           |                   |               |
| <b>Ca<sub>5</sub>(PO<sub>4</sub>)<sub>3</sub>F:Eu<sup>2+</sup></b>                    | <b>4.996</b>       | <b>0</b>     | <b>0</b>     | <b>0.004</b> | <b>385~550 nm</b> | <b>451 nm</b> |
| <b>Ca<sub>3</sub>Ba<sub>2</sub>(PO<sub>4</sub>)<sub>3</sub>F:Eu<sup>2+</sup></b><br>+ | <b>2.908</b>       | <b>0</b>     | <b>2.087</b> | <b>0.005</b> | <b>375~750 nm</b> | <b>464 nm</b> |
| <b>CaBa<sub>4</sub>(PO<sub>4</sub>)<sub>3</sub>F:Eu<sup>2+</sup></b>                  | <b>0.987</b>       | <b>0</b>     | <b>4.011</b> | <b>0.003</b> | <b>370~600 nm</b> | <b>414 nm</b> |
| <b>Ba<sub>5</sub>(PO<sub>4</sub>)<sub>3</sub>F:Eu<sup>2+</sup></b>                    | <b>0</b>           | <b>0</b>     | <b>4.997</b> | <b>0.003</b> | <b>390~580 nm</b> | <b>436 nm</b> |
| <b>Sr<sub>2</sub>Ba<sub>3</sub>(PO<sub>4</sub>)<sub>3</sub>F:Eu<sup>2+</sup></b>      | <b>0</b>           | <b>1.937</b> | <b>3.059</b> | <b>0.004</b> | <b>365~600 nm</b> | <b>424 nm</b> |
| <b>Sr<sub>4</sub>Ba(PO<sub>4</sub>)<sub>3</sub>F:Eu<sup>2+</sup></b>                  | <b>0</b>           | <b>3.914</b> | <b>1.081</b> | <b>0.004</b> | <b>365~575 nm</b> | <b>447 nm</b> |
| <b>Sr<sub>5</sub>(PO<sub>4</sub>)<sub>3</sub>F:Eu<sup>2+</sup></b>                    | <b>0</b>           | <b>4.996</b> | <b>0</b>     | <b>0.004</b> | <b>375~525 nm</b> | <b>436 nm</b> |
| <b>Sr<sub>4</sub>Ca(PO<sub>4</sub>)<sub>3</sub>F:Eu<sup>2+</sup></b>                  | <b>1.151</b>       | <b>3.845</b> | <b>0</b>     | <b>0.003</b> | <b>380~550 nm</b> | <b>449 nm</b> |
